RESEARCH ARTICLE

# Impact of a CXCL12/CXCR4 Antagonist in Bleomycin (BLM) Induced Pulmonary Fibrosis and Carbon Tetrachloride (CCl<sub>4</sub>) Induced Hepatic Fibrosis in Mice

Leola N. Chow<sup>1\*</sup>, Petra Schreiner<sup>2</sup>, Betina Y. Y. Ng<sup>2</sup>, Bernard Lo<sup>2</sup>, Michael R. Hughes<sup>2</sup>, R. Wilder Scott<sup>2</sup>, Vionarica Gusti<sup>1</sup>, Samantha Lecour<sup>1</sup>, Eric Simonson<sup>1</sup>, Irina Manisali<sup>1</sup>, Ingrid Barta<sup>2</sup>, Kelly M. McNagny<sup>2</sup>, Jason Crawford<sup>2</sup>, Murray Webb<sup>2</sup>, T. Michael Underhill<sup>2\*</sup>

**1** The Centre for Drug Research and Development, Vancouver, British Columbia, Canada, **2** The Biomedical Research Centre, University of British Columbia, Vancouver, British Columbia, Canada

\* [lchow@cdrd.ca](mailto:lchow@cdrd.ca) (LNC); [tunderhi@bc.ubc.ca](mailto:tunderhi@bc.ubc.ca) (TMU)

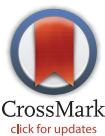

**OPEN ACCESS**

**Citation:** Chow LN, Schreiner P, Ng BYY, Lo B, Hughes MR, Scott RW, et al. (2016) Impact of a CXCL12/CXCR4 Antagonist in Bleomycin (BLM) Induced Pulmonary Fibrosis and Carbon Tetrachloride (CCl<sub>4</sub>) Induced Hepatic Fibrosis in Mice. PLoS ONE 11(3): e0151765. doi:10.1371/journal.pone.0151765

**Editor:** Partha Mukhopadhyay, National Institutes of Health, UNITED STATES

**Received:** October 14, 2015

**Accepted:** March 3, 2016

**Published:** March 21, 2016

**Copyright:** © 2016 Chow et al. This is an open access article distributed under the terms of the [Creative Commons Attribution License](https://creativecommons.org/licenses/by/4.0/), which permits unrestricted use, distribution, and reproduction in any medium, provided the original author and source are credited.

**Data Availability Statement:** All relevant data are within the paper.

**Funding:** This work was supported by Innovation Funds from The Centre for Drug Research and Development and Canadian Institutes of Health Research grant (MOP-106484) to MU. The funders had no role in the study design, data collection and analysis, decision to publish, or preparation of the manuscript.

## Abstract

Modulation of chemokine CXCL12 and its receptor CXCR4 has been implicated in attenuation of bleomycin (BLM)-induced pulmonary fibrosis and carbon tetrachloride (CCl<sub>4</sub>)-induced hepatic injury. In pulmonary fibrosis, published reports suggest that collagen production in the injured lung is derived from fibrocytes recruited from the circulation in response to release of pulmonary CXCL12. Conversely, in hepatic fibrosis, resident hepatic stellate cells (HSC), the key cell type in progression of fibrosis, upregulate CXCR4 expression in response to activation. Further, CXCL12 induces HSC proliferation and subsequent production of collagen I. In the current study, we evaluated AMD070, an orally bioavailable inhibitor of CXCL12/CXCR4 in alleviating BLM-induced pulmonary and CCl<sub>4</sub>-induced hepatic fibrosis in mice. Similar to other CXCR4 antagonists, treatment with AMD070 significantly increased leukocyte mobilization. However, in these two models of fibrosis, AMD070 had a negligible impact on extracellular matrix deposition. Interestingly, our results indicated that CXCL12/CXCR4 signaling has a role in improving mortality associated with BLM induced pulmonary injury, likely through dampening an early inflammatory response and/or vascular leakage. Together, these findings indicate that the CXCL12-CXCR4 signaling axis is not an effective target for reducing fibrosis.

## Introduction

### Hepatic fibrosis

Hepatic fibrosis is a pathological wound healing response to liver damage that is characterized by excess production and deposition of extracellular matrix (ECM) components [1–3]. Insults that can trigger a fibrotic response include viral infection, alcohol or drug toxicity, metabolic diseases and a variety of factors that induce an inflammation response in the liver [1, 4, 5]. The

**Competing Interests:** The authors have declared that no competing interests exist.

increased deposition of ECM and its altered composition lead to progressive functional deficits [6, 7]. Hepatic fibrosis and its end stage cirrhosis ranked 14<sup>th</sup> and 10<sup>th</sup> leading causes of death in the world and in developed countries respectively [8]. Unfortunately, this trend is expected to increase worldwide [8]. Hepatic fibrosis is reversible whereas cirrhosis, the end stage consequence of fibrosis, is generally not [2, 3]. Thus, it is important to identify therapy for hepatic fibrosis, as none currently exist [4, 6] and to prevent its progression to cirrhosis.

It has been established that hepatic stellate cells (HSCs) are the main cells contributing to the process of liver fibrogenesis [2, 4, 9]. HSC are fat and vitamin A storing cells in the body [10] but following liver injury, HSC become activated and undergo a morphological transition to myofibroblast-like cells [2, 11]. Activated HSCs produce an appreciable amount of ECM components [11]. Activation factors can include damaged hepatocytes, infiltrating inflammatory cells, endothelial cells, Kupffer cells (tissue macrophages), changes in ECM composition and metabolites of toxic agents [2, 11].

## Pulmonary fibrosis

Idiopathic pulmonary fibrosis (IPF) is a chronic, irreversible and often fatal pulmonary disorder of unknown etiology and is characterized by progressive fibrosis of the lung parenchyma leading to scarring and loss of lung function [12]. IPF primarily occurs in older adults with a median survival time of 2–4 years after diagnosis [13, 14]. Prevalence in the United States has increased steadily from 202.2 cases per 100,000 people in 2001 to 494.5 cases per 100,000 people in 2011 [15]. Despite Phase 2 and 3 clinical trials indicating that pirfenidone was able to improve lung function in patients [16–18] there is still no current treatment for IPF as anti-inflammatory, anti-fibrotic and immunosuppressive therapies have proven ineffective [12, 19, 20]. Hence, there is an urgent need for an effective IPF therapy.

The fibrotic response in IPF appears to be driven by abnormally activated alveolar epithelial cells (AECs) which induce fibroblast proliferation, differentiation and recruitment [12]. Activated fibroblasts (myofibroblasts) secrete exaggerated amounts of ECM and destroy the architecture of the lung (reviewed in [12]). The origin of lung myofibroblasts remains a contentious issue. Recent lineage tracing studies based on a Foxd1-Cre line have shown that lung resident perivascular mesenchymal cells in addition to “lung fibroblasts” contribute to the lung myofibroblast population after bleomycin (BLM)-induced injury [21]. Circulating fibrocytes derived from bone marrow have also been reported to contribute to the myofibroblasts and type I collagen production in the lung [22–27]. However, recent studies have shown that bone marrow derived fibrocytes make a negligible contribution to type I collagen in lung fibrosis [28].

## CXCR4/CXCL12 signaling and its putative role in lung and hepatic fibrosis

The 7-transmembrane G-protein coupled chemokine receptor, CXCR4 and its ligand CXCL12 (SDF-1 $\alpha$ -stromal cell derived factor-1 $\alpha$ ) [29, 30] are involved in the homing of hematopoietic stem cells to the bone marrow, mobilization of stem cells from the bone marrow to the peripheral blood and injured tissues and act as a chemoattractant for different leukocyte populations [31–33]. CXCL12 is expressed in bile duct epithelial cells in normal human liver [34, 35] and its expression is upregulated in the liver and plasma of patients with advanced hepatic fibrosis relative to control patients [35]. Both human and murine HSCs express CXCR4 and its expression increases with HSC activation [36]. In particular, CXCR4/CXCL12 signaling has been shown to induce HSC proliferation and collagen I production [36]. Furthermore, liver sinusoidal endothelial cells have also been shown to express *Cxcr4* and another CXCL12 receptor, *Cxcr7* after hepatic injury [37] and to participate in liver regeneration and fibrosis.

In pulmonary fibrosis (PF), it was shown that circulating fibrocytes were increased in patients with stable IPF relative to controls and quantification of fibrocytes may even serve as an indicator of mortality in IPF patients [24]. Given the evidence that fibrocytes from the circulation and progenitor stem cells from the bone marrow maybe recruited to the lung during pulmonary fibrogenesis [22, 23, 25–27], it has been argued that the mobilization of these cells to the injured lung is likely in response to CXCL12 to mediate fibrosis [23, 25–27]. Specifically, inhibition of CXCR4/CXCL12 signaling with anti-CXCL12 antibody reduced recruitment of CD45<sup>+</sup> Col1<sup>+</sup> CXCR4<sup>+</sup> fibrocytes in BLM exposed mice [25] and reduced lung fibrosis [23, 25–27].

## CXCR4/CXCL12 antagonist

There are a number of small molecule CXCR4 antagonists, initially generated as potential anti-HIV treatments or as hematopoietic stem cell mobilization agents [38]. The approved, i.v.-administered CXCR4 antagonist, plerixafor (AMD3100) [39], had been evaluated in a number of BLM-induced pulmonary fibrosis models [23, 26, 27] including one recently-retracted article [40]. In addition, AMD3100 had been used in models of hepatic injury with reported beneficial results in a rat model of acute liver failure [41] and a report of exacerbation in a murine model of chronic liver injury [42].

Recently, an orally bioavailable CXCR4 antagonist, AMD070, had been developed and had shown safety and proof-of-concept oral efficacy in a human clinical trial for HIV treatment [43, 44]. In the hope of resolving the apparently contradictory data for the effects of CXCR4/CXCL12 modulation in models of hepatic injury and evaluating whether CXCR4/CXCL12 could be a potential therapeutic target in fibrotic diseases, we tested the efficacy of AMD070 in a BLM induced murine model of PF and in a carbon tetrachloride (CCl<sub>4</sub>) induced murine model of hepatic fibrosis. Our results suggest that AMD070 was able to increase survival in BLM-induced PF but surprisingly, had no effect on lung fibrosis. Furthermore, AMD070 had no effect in a CCl<sub>4</sub> induced murine model of hepatic fibrosis. Similar to its predecessor AMD3100, AMD070 showed a dose response for leukocytosis attributed to CXCR4 antagonism [45, 46]. In summary, our data suggest inhibition of the CXCR4/CXCL12 axis may alter the early inflammatory and vascular response to acute fibrosis but has no direct effect on the deposition of fibrotic matrix per se.

## Materials and Methods

All animal studies described in this article had complied with the Canadian Council on Animal Care guidelines and University of British Columbia Animal Care Committee. All animal studies had also been approved by the University of British Columbia Animal Care Committee.

Animals were housed in ventilated cages, maximum 5 per cage, in a 12-hour light/dark cycle and cages were changed once every 10 to 14 days. Animals received sterile food and water *ad libitum* and were handled aseptically. Animals were monitored at least twice daily with health monitor forms prior and post compound administration and any animal deemed to be at humane endpoint was euthanized. Criteria used for humane endpoint for the following experiments included one or more of the following: loss of >20% body weight, marked scuffed fur, hunched body, labored breathing, lack of response to stimulus and lethargic animal. To minimize animal suffering and distress, environmental enrichments such as shredded, crinkled brown paper for nest building and translucent, red polycarbonate house for shelter were provided. Isoflurane was also used as anesthetics when required as described below.

## Murine model of pulmonary fibrosis

PF was induced in six-weeks old female CD-1 mice purchased from Harlan. Animals were randomly divided into three groups ( $n = 10/\text{group}$ ): PBS plus acetate buffer control, BLM plus acetate buffer and BLM plus AMD070. Some animals in the BLM plus acetate buffer and the BLM plus AMD070 groups reached a humane endpoint prior to day 22 (hence  $n = 4$  and  $n = 9$  respectively) and were euthanized.

On day 0, mice were anaesthetized with isoflurane and PF was induced by BLM administration. Specifically, BLM (C103610, Fresenius Kabi Canada, 2U/kg) in 40  $\mu\text{L}$  PBS or vehicle control (PBS) was administered by non-surgical endotracheal instillation with sterile disposable plastic loading pipette tips. The next day, AMD070 (Shanghai Haoyuan Chemexpress Co., 400  $\mu\text{g}/\text{mouse}$  in 200  $\mu\text{L}$  30 mM acetate buffer) or 200  $\mu\text{L}$  of 30 mM acetate buffer (pH 5) was administered via oral gavage (PO) with a 20G feeding needle. AMD070 or acetate buffer vehicle was administered daily for 21 consecutive days. Animals were euthanized with avertin overdose on day 22.

## Murine model of hepatic fibrosis

Hepatic fibrosis was induced in eleven week old female C57BL/6 mice from JAX Labs. Animals were randomly divided into three groups: oil plus vehicle (PBS) control,  $\text{CCl}_4$  plus vehicle (PBS) control and  $\text{CCl}_4$  plus AMD070. As some animals were euthanized prior to study completion because they had reached a humane endpoint, final group numbers were  $n = 9$  for oil plus vehicle (PBS) control,  $n = 6$  for  $\text{CCl}_4$  plus vehicle (PBS) control and  $n = 7$  for  $\text{CCl}_4$  plus AMD070 groups. On day 0, mice received intraperitoneal (IP) injection of  $\text{CCl}_4$  (1 mL/kg) diluted in olive oil (1 part  $\text{CCl}_4$  and 3 parts olive oil hence 4 mL/kg of total volume) or olive oil control (4 mL/kg) twice a week for four consecutive weeks. Starting one day prior to the initial  $\text{CCl}_4$  treatment (day -1), dosing with either AMD070 reconstituted in PBS (50 mg/kg) or PBS vehicle control (10 mL/kg) was administered IP and continued 5 days/week for 4 weeks. Specifically, AMD070 or PBS treatments were not performed on the 2 days/week on which animals were given  $\text{CCl}_4$  (or olive oil vehicle control). One day after the last AMD070 or PBS treatment, animals were euthanized with  $\text{CO}_2$ .

## Histology and percent fibrosis analysis of the lung and liver

Following perfusion with PBS, lungs were fixed in 4% paraformaldehyde at 4°C for 2 days. These were embedded in paraffin, sectioned at 1 mm apart and stained with hematoxylin-eosin (H&E) and Masson's Trichrome stains. For quantitation of percent PF, entire lung and fibrotic areas were outlined. Percent fibrotic area was calculated by dividing fibrotic area ( $\text{mm}^2$ ) by total lung area ( $\text{mm}^2$ ) and multiplying by 100. For H&E stained slides, two histology slides/animal were selected from the central region of the lungs and analyzed whereas only one histology slide/animal was analyzed with Masson's Trichrome stained slides. These analyses were performed with Image J and the analyst was blinded to sample identification.

Livers were perfused with PBS then 10% formalin and the left top lobe preserved in 10% neutral buffer formalin (NBF) for a week. The fixed liver was embedded in paraffin, six cross sections at 500  $\mu\text{m}$  apart generated and stained with Picrosirius Red. For quantitation of percent hepatic fibrosis, fibrotic area (Picrosirius Red) was divided by total liver area and multiplying by 100. Three histology slides/animal were analyzed. The three slides corresponded to one slide from each of the alternative six cross sections. These analyses were performed with Olympus cellSens and the analyst was blinded to sample identity.

## RNA isolation and quantitative real-time qPCR

The top right lobe of livers were homogenized in 1 mL of Trizol (Invitrogen) and flash frozen in dry ice and stored in  $-80^{\circ}\text{C}$  for RNA isolation to perform RT-qPCR. Total RNA was isolated and cDNA prepared using the High Capacity cDNA Reverse Transcription kit according to the manufacturer's instructions (Life Technologies). RT-qPCR was carried out as previously described using the standard curve method [47]. The following primer/probe sets were used to detect: *Acta2* (IDT Assay-N007392.1), Probe- 5'-/56-FAM/TTACAGAGC/ZEN/CCAGA GCCATTGTCG/3IABkFQ/3', Primer 1-5'-GTGAAGAGGAAGACAGCACAG-3', Primer 2: 5'-GCCATTCCAACCATTACTCC-3'; *Col1a1* (Life Technologies custom primer/probe mix), primer 1-5'-CTTCACCTACAGCACCCCTTGTG, primer 2-5'- TTGGTGGTTTTGTA TTCGATGACT, probe- 5'-FAM-ACACCGGAACCTTGGG-MGBNFQ; *Tbp* (Life Technologies custom primer/probe mix), Primer 1-5'-AGAATAAGAGAGCCACGGACAACCT, Primer 2-5'-TGGCTCCTGTGCACACCAT, Probe- 5'-FAM-CGTTGATTTTCAGTTCTGG-MGBN FQ; *Gapdh* (IDT Assay-Mm.PT.39a.1), probe- 5'-/56-FAM/TGCAAATGG/ZEN/CAGCCC TGGTG/3IABkFQ/3', primer 1-5'-AATGGTGAAGGTCGGTGTG-3', primer 2-5'-GTGGA GTCATACTGGAACATGTAG-3'.

## Serum aspartate aminotransferase (AST) activity

Five  $\mu\text{L}$  of serum was used with the AST Activity Assay Kit (Sigma MAK055) as per manufacturer's instructions to determine serum AST levels.

## Pharmacokinetic (PK) studies and Hematology measurements

**AMD070 PK studies via PO.** Non fasted CD-1 female mice at six weeks of age from Harlan were sacrificed at 0.5, 1, 2, 3, 6, 24 and 48 hours ( $n = 3/\text{time point}$ ) post administration of AMD070 reconstituted in 30 mM acetate buffer (pH 5) (200 or 400  $\mu\text{g}/\text{mouse}$ ). At each endpoint, mice were euthanized with  $\text{CO}_2$  and blood collected via cardiac puncture. An aliquot was set aside at room temperature for hematology measurements with remaining blood processed for plasma for drug concentration determination. Lungs were collected and immediately frozen on dry ice and stored at  $-70^{\circ}\text{C}$  until determination of drug concentration.

**AMD070 PK studies via IP injections.** Non fasted C57BL/6 mice at 7 to 8 weeks of age from Harlan were sacrificed at 0.5, 1, 2, 3, 6, 24 and 48 hours ( $n = 3/\text{time point}$ ) post administration of AMD070 (in 30 mM acetate buffer, pH 5) (400  $\mu\text{g}/\text{mouse}$ ). At each endpoint, animals were euthanized with  $\text{CO}_2$  and blood collected via cardiac puncture. An aliquot was set aside at room temperature for hematology measurements with remaining blood processed for plasma for drug concentration determination. Lungs and livers were also collected and immediately frozen on dry ice and stored at  $-70^{\circ}\text{C}$  until determination of drug concentration.

**AMD070 PK studies via SC (subcutaneous) injections.** Non fasted C57BL/6 mice at 7 to 8 weeks of age from Harlan were sacrificed at 0.5, 1, 3, 24 and 48 hours ( $n = 3/\text{time point}$ ) post administration of AMD070 (in 30 mM acetate buffer, pH 5) (400  $\mu\text{g}/\text{mouse}$ ). All preceding procedures were same as those for AMD070 PK studies via IP injections.

**Bioanalysis of AMD070 in the plasma, lung and liver tissue.** AMD070 concentrations in mouse plasma were determined using protein precipitation extraction followed by UPLC-MS/MS analysis. Briefly, 100  $\mu\text{L}$  aliquots of plasma were transferred to individual wells of an Isolute PPT+ (Biotage) array plate containing 300  $\mu\text{L}$  of 0.1% formic acid (FA) in acetonitrile (ACN). Following a few minutes of room temperature incubation, the samples were filtered by applying  $\text{N}_2$  (g) pressure using the Pressure+ 96 manifold (Biotage). 200  $\mu\text{L}$  of sample filtrate was then transferred to a separate 96-well plate and evaporated to dryness using a Turbovap 96. The sample residue was then reconstituted into 200  $\mu\text{L}$  of 0.1/5/95 FA/ACN/ $\text{H}_2\text{O}$  (v/v/v) and



analyzed using reverse phase chromatography (gradient elution) combined with multiple reaction monitoring acquisition (MRM). The mobile phases consisted of 0.1% FA in H<sub>2</sub>O and 0.1% FA in ACN.

AMD070 was extracted from lung and liver tissue by homogenization under basic conditions followed by liquid-liquid extraction in tert-butyl methyl ether (TBME) and ethyl acetate respectively. In summary, 50 mg of lung or liver tissue pieces were cut, weighed, and transferred to homogenization tubes. 25  $\mu$ L of deionized water for lung and 10  $\mu$ L for liver were added to each tube, followed by the addition of zirconium (Zr) homogenization beads. The samples were homogenized for approximately 20 seconds in the BeadBeater, followed by 1 minute of centrifugation at room temperature at 13,520 rcf. 200  $\mu$ L of 1 N NaOH was then transferred to each tube, followed by a second homogenization/centrifugation cycle as described above. Next, 750  $\mu$ L of TBME or ethyl acetate were added to each lung and liver tubes respectively followed by a third homogenization cycle (20 sec) and 10 minutes of centrifugation (room temperature, 13,520 rcf). 500  $\mu$ L of TBME or ethyl acetate extracts were then transferred to corresponding wells on 96-well plates and evaporated to dryness. The dried residue was reconstituted into 0.1/5/95 TFA/ACN/H<sub>2</sub>O and analyzed using reverse phase chromatography (gradient elution) combined with MRM acquisition in positive electrospray mode (ES+). The mobile phases consisted of 0.1% TFA in H<sub>2</sub>O and 0.1% TFA in ACN.

## Results

### Pharmacokinetics and Pharmacodynamics of AMD070 administered PO

Prior to the efficacy study of AMD070 administered by PO in the BLM-induced lung fibrosis model, we wished to confirm that AMD070 given by this route would accumulate in the lungs and in addition, had the anticipated effects on white blood cell (WBC) counts. CD-1 mice were given AMD070 by PO administration at a dose of either 200 or 400  $\mu$ g/animal. Plasma and lung concentrations of AMD070, as well as complete blood cell counts were collected at various times after administration. Oral administration of AMD070 was associated with very low plasma concentrations of drug (data not shown) but a dose dependent accumulation of drug in the lungs was observed. Specifically, although mice given AMD070 at 200  $\mu$ g/animal had detectable but not quantifiable drug levels, when administered at the higher dose of 400  $\mu$ g/animal, reproducible drug concentrations in the lungs were observed with  $C_{\max}$  concentrations of 267 ng/g observed 6 hours after PO (Fig 1). Importantly, the IC<sub>50</sub> of AMD070 is 13 nM representing a concentration of approximately 4.5 ng/mL and a protein binding adjusted effective concentration (EC<sub>90</sub>) to achieve 90% effectiveness of 44ng/mL [48]. The lung concentrations achieved after oral administration of AMD070 (Fig 1) were significantly above both these thresholds for at least 21 of the 24 hours after dosing as determined by WinNonlin analysis.

Consistent with these findings, we observed a dose-dependent effect of orally-administered AMD070 on WBC counts in these mice. Specifically, we observed a significant, transient increase in WBCs in mice dosed with AMD070 at 200  $\mu$ g/mouse, with a  $T_{\max}$  observed 3 hours following administration. At the 400  $\mu$ g/mouse dose of AMD070, the WBC counts were increased and remained elevated for the full 24 hours of the study. In contrast, red blood cell (RBC) and platelet counts did not change after administration of AMD070 at either dose (Fig 2). White blood cell differentials are provided (Fig 3) and showed that the increase in WBC counts in whole blood shown in Fig 2 were the result of increased lymphocytes; we observed no increases in neutrophils, monocytes or eosinophils in these mice. These observations are consistent with literature reports on the effects of AMD070 on WBC mobilization [45].

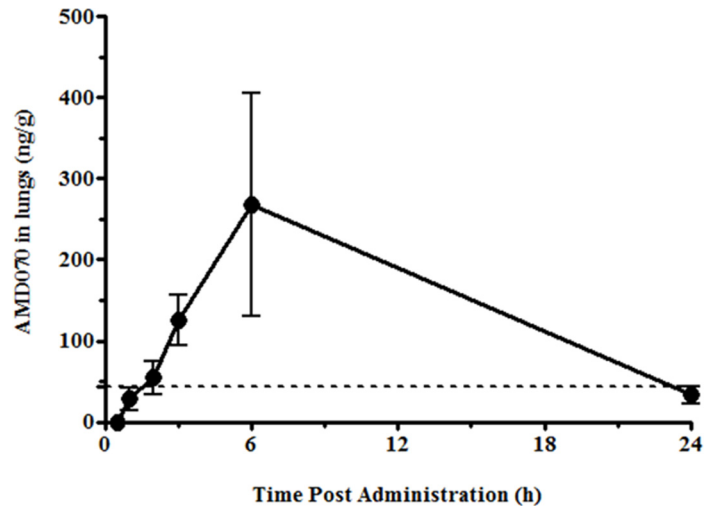

**Fig 1. Pharmacokinetics of AMD070 in the lung of CD-1 mice.** Concentration of AMD070 in the lungs of CD-1 mice at various times after PO administration at 400  $\mu\text{g}/\text{animal}$ . Data represent the means ( $\pm$  SEM) of 3 mice. Horizontal dash line represents  $\text{EC}_{90}$  of 44ng/mL. (SEM, Standard error of mean).

doi:10.1371/journal.pone.0151765.g001

### Efficacy of AMD070 in a murine model of pulmonary fibrosis

The  $\text{IC}_{50}$  and  $\text{EC}_{90}$  of AMD070 against CXCR4 were 4.5 ng/mL and 44 ng/mL respectively (Fig 1) [48], indicating that AMD070 concentrations in the lung were significantly greater than the  $\text{IC}_{50}$  and  $\text{EC}_{90}$  for the majority of the 24 hours after PO dosing. Based on these results, it was anticipated that oral administration of AMD070 at 400  $\mu\text{g}/\text{animal}$  should achieve the needed systemic and tissue exposure to elicit a biological response in the BLM-induced model of PF. In addition, inhibition of CXCR4/CXCL12 had been shown to reduce lung fibrosis in a BLM induced murine model of PF [23, 26, 27].

To determine whether AMD070 would have the anticipated effect, animals were randomly divided into three groups: PBS plus acetate buffer control, BLM plus acetate buffer and BLM plus AMD070. These groups were treated with BLM (or PBS vehicle control), AMD070 (or acetate buffer control) as detailed in Materials and Methods. Animals were euthanized one day after the last AMD070 treatment (Day 22). Treatment with AMD070 was not associated with reduction of lung inflammation and fibrosis in the surviving mice. H & E stained lungs showed an average of 5.4% (SEM  $\pm$  2.4) lung inflammation in the BLM plus acetate buffer control; 14.2% (SEM  $\pm$  3.0) in the BLM plus AMD070 and 0% (n = 10) in the PBS plus acetate buffer groups respectively (Fig 4). When lungs were stained with Masson's Trichrome stains, there was an average value of 3.7% (SEM  $\pm$  1.1) lung fibrosis in the BLM plus acetate buffer control; 10.5% (SEM  $\pm$  2.5) in the BLM plus AMD070 and 0% (n = 10) in the PBS plus acetate buffer groups respectively (Fig 5).

In contrast to the absence of an effect of AMD070 on lung inflammation and fibrosis in BLM-treated mice, there was a significant effect of AMD070 on BLM induced mortality. Animals receiving AMD070 and BLM, showed 90% survival over the duration of the study (Fig 6). Those animals with BLM induced PF and treated with acetate buffer exhibited significant mortality between study days 8 to 14 with 60% of these animals requiring humane euthanasia (Fig 6). This mortality was almost entirely mitigated by daily gavage with AMD070; 90% of BLM treated animals receiving AMD070 survived to the completion of the study (Fig 6) indicating a very significant therapeutic benefit achieved by AMD070 in this disease model.

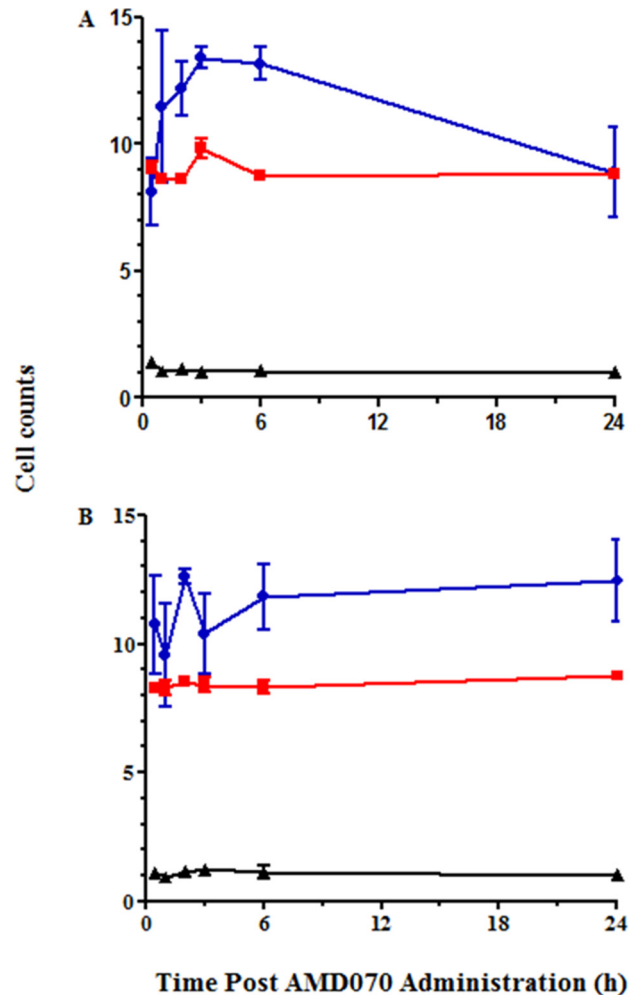

**Fig 2. PO administration of AMD070 increased leukocyte mobilization.** Cell counts in the blood of CD-1 mice at various times after the PO administration of AMD070 at either 200 (A) or 400 (B) µg/mouse. Data shown are WBCs (•; x 10<sup>3</sup>/µL), RBCs (■; x 10<sup>6</sup>/µL) and platelets (▲ x 10<sup>6</sup>/µL) and are the means (± SEM) of 3 animals.

doi:10.1371/journal.pone.0151765.g002

### Pharmacokinetics and Pharmacodynamics of AMD070 administered IP

As a prelude to an efficacy study of AMD070 in a murine model of hepatic fibrosis, we wished to alter the dosing route from PO to a route less likely to cause injury during repetitive dosing for 4 weeks. Therefore, a pharmacokinetic study was conducted to compare IP and SC routes of administration. After IP administration of AMD070, plasma concentrations of AMD070 peaked 30 minutes post administration at an average of 0.77 µg/mL of plasma and descending to an average of 0.045 µg/mL six hours post administration (Fig 7). In the lung, AMD070 concentration peaked 30 minutes post administration to an average of 6.14 µg/g of lung tissue and decreasing to an average of 3.74 µg/g six hours post administration (Fig 7). In the liver, AMD070 concentration peaked 30 minutes post administration to an average of 14.3 µg/g of liver tissue and decreasing to an average of 6.47 µg/g six hours post administration (Fig 7). When compared to plasma, lung and liver concentrations after SC administration of AMD070 (data not shown), the drug concentrations achieved using IP administration were somewhat higher than those achieved with SC administration. In summary, this showed substantial drug



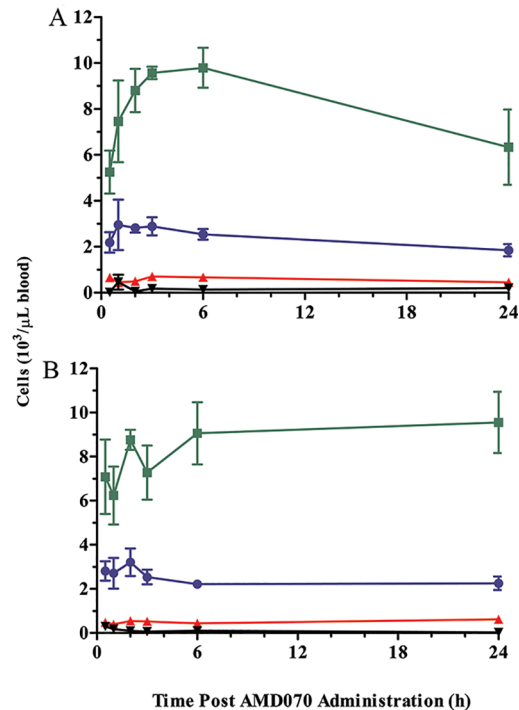

**Fig 3. Leukocyte mobilization induced by AMD070 was the result of increase in lymphocytes.** Differential cell counts in the blood of CD-1 mice at various times following PO administration of AMD070 at either 200 (A) or 400 (B)  $\mu\text{g}/\text{mouse}$ . Data are shown for lymphocytes ( $\blacksquare$ ), neutrophils ( $\bullet$ ), monocytes ( $\blacktriangle$ ) and eosinophils ( $\blacktriangledown$ ) and are the means ( $\pm$  SEM) of 3 animals.

doi:10.1371/journal.pone.0151765.g003

accumulation in the lung and liver post IP and SC administration of AMD070. The  $T_{\text{max}}$  (time to reach  $C_{\text{max}}$ ),  $C_{\text{max}}$  (maximum drug concentration) and AUC (area under the curve for all time points) values for both the SC and IP routes of administration are summarized in [Table 1](#).

Consistent with these observations, there was a significant but transient increase in WBC counts observed with a  $T_{\text{max}}$  3 hours following IP administration ([Fig 8](#)). In contrast, both RBC and platelet levels were unaffected by AMD070 administration ([Fig 8](#)). Differential analysis showed that the increase of WBC counts was largely due to increased lymphocytes and neutrophils ([Fig 8](#)). This analysis was also performed after SC administration of AMD070 (data not shown) and the qualitative trend was identical to that achieved with IP administration but the magnitude of these changes were lower in comparison to AMD070 given IP.

Based on these pharmacokinetic and pharmacodynamic observations of AMD070 given by IP and SC routes, IP administration was identified for use in the efficacy study of AMD070 in the murine model of hepatic fibrosis (below).

### Efficacy of AMD070 in a murine model of hepatic fibrosis

Mice were randomly divided into three groups; oil plus vehicle (PBS) control,  $\text{CCl}_4$  plus vehicle (PBS) control and  $\text{CCl}_4$  plus AMD070 groups. After four weeks of treatment as detailed in Materials and Methods, livers were collected and stained with Picrosirius Red and analyzed for percent fibrosis. The top left lobe of the liver was analyzed for all animals. Treatment with AMD070 had no effect on percent liver fibrosis. There was a group average of 0.53%, 3.2% and 3.6% of Picrosirius red staining in the oil plus PBS,  $\text{CCl}_4$  plus PBS and  $\text{CCl}_4$  plus AMD070

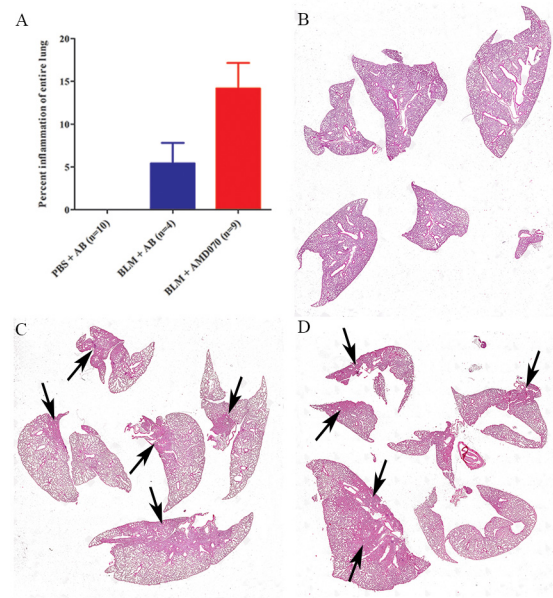

**Fig 4. AMD070 did not alleviate BLM induced lung inflammation at end point as demonstrated by H & E stained lungs.** Graph in (A) represents the means ( $\pm$  SEM) of percent surface area with high inflammatory cell infiltrate, as measured by H&E staining intensity. Representative H & E stained lungs of PBS plus acetate buffer (B), BLM plus acetate buffer (C) and BLM plus AMD070 (D) treated mice. Black arrows indicate areas with increased inflammatory cell infiltrate. AB indicates acetate buffer and this notation is used for the following Figs.

doi:10.1371/journal.pone.0151765.g004

groups respectively (Fig 9). There was also no difference in the mortality rate between these groups.

To determine whether AMD070 effects transcription of genes associated with a myofibroblast phenotype, RT-qPCR was performed on liver RNA collected one day after the last AMD070 treatment. The relative transcription levels of  $\alpha$  smooth muscle actin ( *$\alpha$ Sma, Acta2*) and collagen  $\alpha$ -1(I) chain (*Coll1a1*) relative to housekeeping genes glyceraldehyde-3-phosphate dehydrogenase (*Gapdh*) and TATA binding protein (*Tbp*) were not different between the CCl<sub>4</sub> plus PBS (n = 6) and CCl<sub>4</sub> plus AMD070 groups (n = 7) (Fig 10A & 10B).

Serum AST levels are a marker for liver function and liver injury, and were measured prior to treatment and at the end of the experiment to both confirm CCl<sub>4</sub> induced liver injury and to determine if there were beneficial effects associated with AMD070 treatment that were not observed in the fibrosis measurements. Prior to CCl<sub>4</sub> or oil treatment, serum AST levels were similar between all three treatment groups. After treatment with CCl<sub>4</sub> for 4 weeks, there was a significant increase in serum AST levels, confirming that liver injury was induced by this treatment (Fig 10C). However, those animals that received CCl<sub>4</sub> and AMD070 had no difference in AST serum levels compared to the mice that received CCl<sub>4</sub> and the vehicle control (Fig 10C). Together, these findings indicate that inhibition of CXCR4 has limited impact on hepatic fibrosis.

## Discussion

The overall goal of these studies was to evaluate whether CXCR4 was a potential target for therapeutic intervention in fibrotic diseases. Several studies [23, 26, 27] using CXCR4 antagonists have reported attenuated BLM-induced lung fibrosis in mice. Specifically, AMD3100, an antiviral compound belonging to the bicyclam derivatives that antagonize the CXCR4 receptor

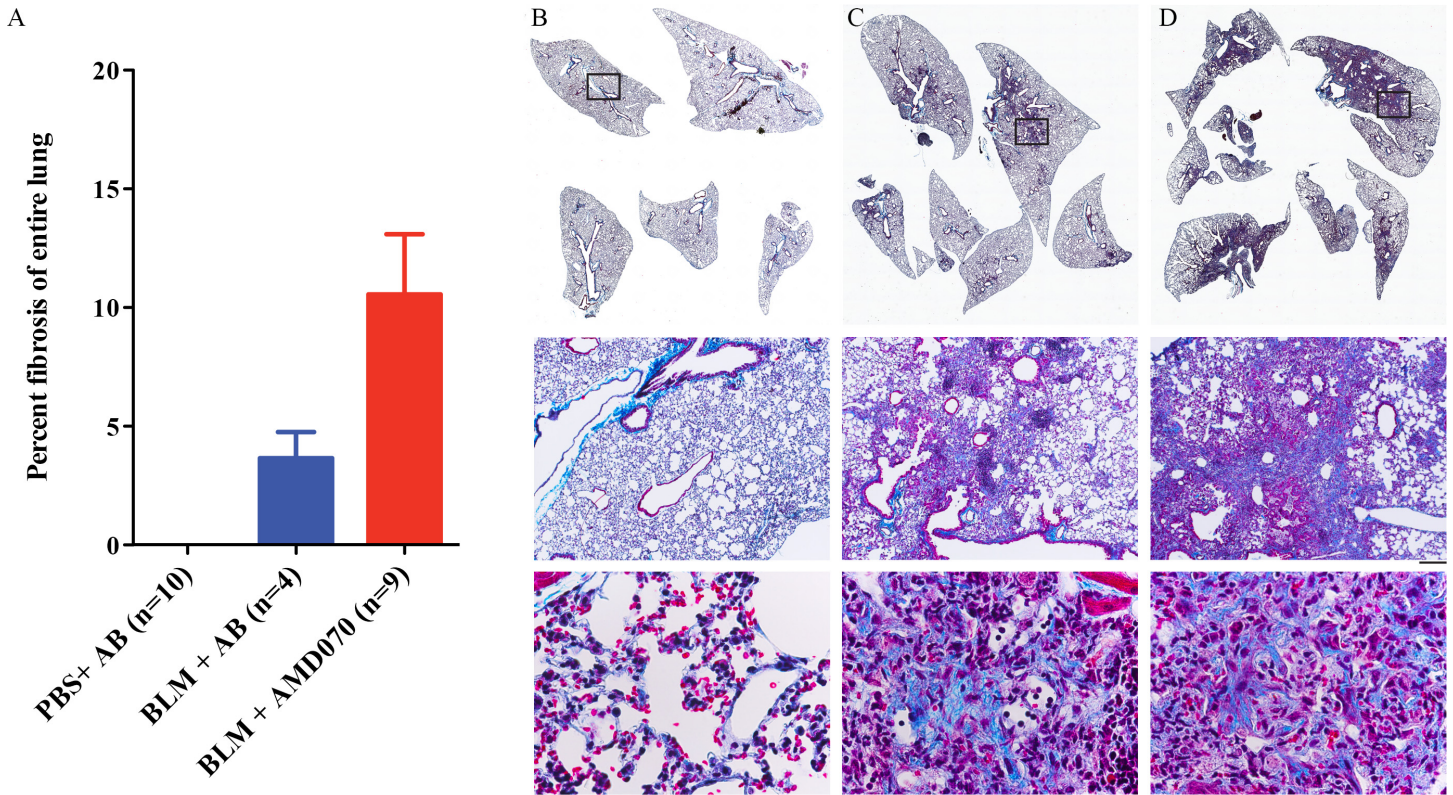

**Fig 5. AMD070 did not alleviate BLM induced lung fibrosis as demonstrated by Masson's Trichrome stained lungs.** Graph in (A) represents the means ( $\pm$  SEM) of percent lung fibrosis. Representative Masson's Trichrome stained lungs of PBS plus acetate buffer (B), BLM plus acetate buffer (C) and BLM plus AMD070 (D) treated mice. Note the intense cyan staining in the middle and lower panels indicative of collagen deposition in the lung parenchyma of BLM-treated mice. Bars represent 200  $\mu$ m for the middle and 20  $\mu$ m for the lower panel.

doi:10.1371/journal.pone.0151765.g005

[49] was able to reduce lung fibrosis and fibrocyte infiltration into the lung [23, 26] in a murine model of BLM induced PF. In the present study, we have used AMD070, an orally bioavailable inhibitor of CXCR4 with improved tolerability [45] and pharmacokinetics, to evaluate the CXCL12/CXCR4 signaling axis in two different murine models of fibrosis. We have taken significant care to ensure that pharmacokinetics and tissue exposure of AMD070 was sufficient to elicit biological responses and have further confirmed the pharmacodynamic activity of AMD070 in each model by monitoring hematopoietic progenitor mobilization.

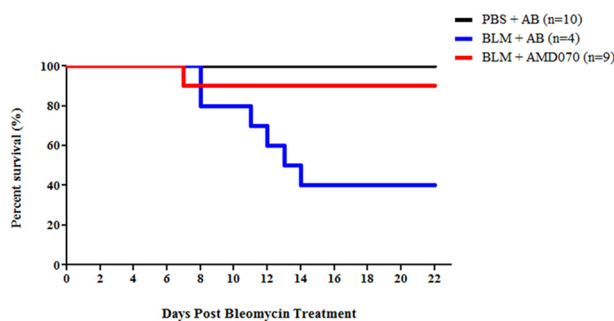

**Fig 6. AMD070 alleviated BLM induced mortality.** Kaplan Meier plot of animals in the PBS plus acetate buffer, BLM plus acetate buffer and BLM plus AMD070 groups.

doi:10.1371/journal.pone.0151765.g006

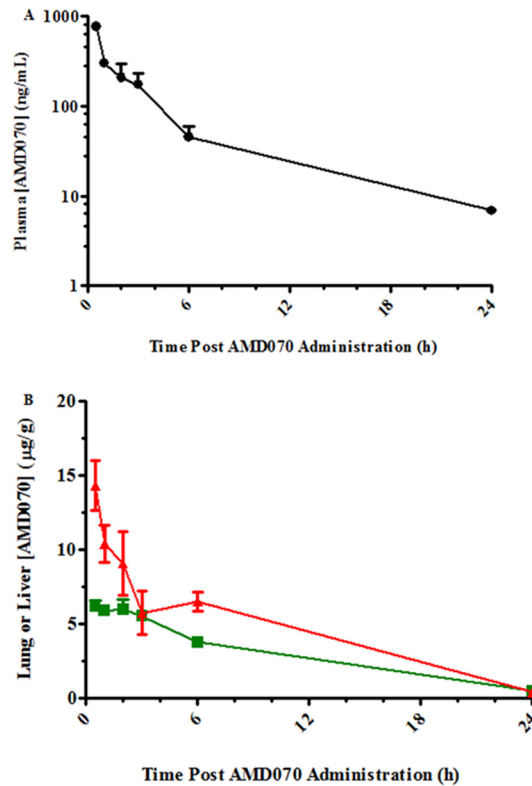

**Fig 7. Pharmacokinetics of AMD070 in the lung, liver and plasma of CD-1 mice.** Concentrations of AMD070 in the plasma (A) and in the liver (B; ▲) or lung (B; ■) of C57BL/6 mice at various times following IP administration. Values shown are mean (± SEM) of n = 4/time point except n = 3 for the 2 hour time point for the liver calculation.

doi:10.1371/journal.pone.0151765.g007

### Pulmonary fibrosis

AMD070 had no effect on the percent fibrosis in the lungs of the BLM-treated animals. As suggested earlier, this is inconsistent with studies by Makino et al. and Song et al. [23, 26]. It was suggested that bone marrow derived mesenchymal stem cells (BMDMSC) migrate out of the bone marrow and there is an increase of fibrocytes in the lung between 3 and 7 days post BLM

**Table 1. Phoenix WinNonlin Noncompartmental analysis of AMD070 concentration in the plasma, lung and liver of C57BL/6 mice following IP or SC administration of AMD070 at 400 µg/mouse.** Values for C<sub>max</sub> are provided as µg/mL for plasma and as µg/g for liver and lung. Values for AUC are provided as µg/mL for plasma and as µg/g for lung and liver.

| Routes                | Plasma |      | Lung  |       | Liver  |       |
|-----------------------|--------|------|-------|-------|--------|-------|
|                       | IP     | SC   | IP    | SC    | IP     | SC    |
| T <sub>max</sub> (h)  | 0.5    | 0.5  | 0.5   | 1.0   | 0.5    | 0.5   |
| C <sub>max</sub>      | 0.77   | 0.70 | 6.14  | 5.65  | 14.29  | 5.76  |
| AUC                   | 1.24   | 0.97 | 75.74 | 80.76 | 112.33 | 77.18 |
| Tissue AUC/Plasma AUC | -      | -    | 61.18 | 83.34 | 90.74  | 79.65 |

T<sub>max</sub> (time to reach C<sub>max</sub>)

C<sub>max</sub> (maximum drug concentration)

AUC (area under the curve for all time point)

Tissue AUC/Plasma AUC (Tissue AUC divided by Plasma AUC)

doi:10.1371/journal.pone.0151765.t001

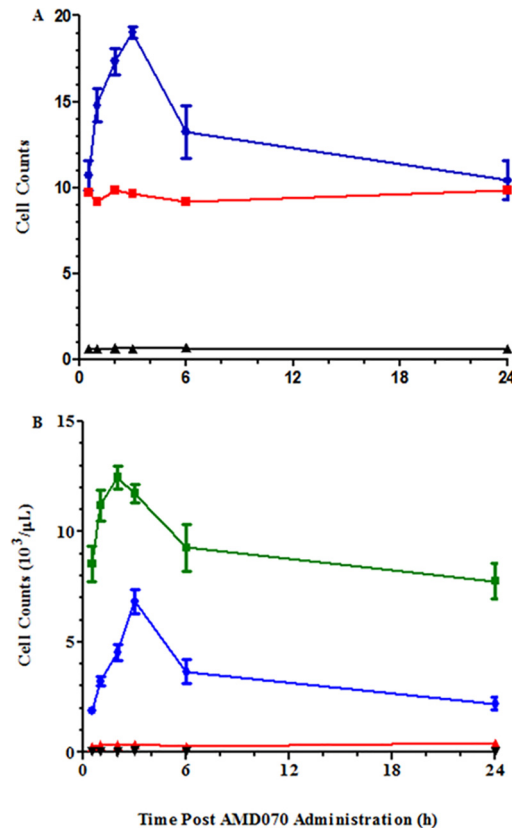

**Fig 8. IP administration of AMD070 increased leukocyte mobilization.** Cell counts in the blood of C57BL/6 mice at various times following the IP administration of AMD070 at 400 µg/mouse. A comparison of the numbers of WBCs (●; x 10<sup>3</sup>/µL), RBCs (■; x 10<sup>6</sup>/µL) and platelets (▲; x 10<sup>6</sup>/µL) are shown in panel (A) and are the means (± SEM) of 4 animals. Differential cell counts at various times are shown in panel (B) for lymphocytes (■), neutrophils (●), monocytes (▲) and eosinophils (▼) and are the means (± SEM) of 4 animals.

doi:10.1371/journal.pone.0151765.g008

injury [23, 26, 27]. It was reported that BLM treatment significantly induced chemotactic migration of BMDMSC to the lung 3 days post treatment and that this migration was inhibited by CXCR4 antagonists [26, 27]. Specifically, *in vivo*, AMD3100 decreased the number of fibrocytes in the lung at 3 and 7 days post BLM treatment [23, 26]. Increased expression of CXCR4 and CXCL12 in the lung was also observed beginning day 3 and up to day 21 after BLM treatment [26, 27]. Transplanted circulating human fibrocytes also migrated to fibrotic lungs in response to CXCR4/CXCL12 signaling in BLM induced murine PF [25]. Based on these and other observations, it has been proposed that CXCL12 chemoattracts BMDMSC and circulating fibrocytes to the lung via CXCR4/CXCL12 signaling during lung fibrosis [23, 25–27].

Previous reports demonstrated a role for CXCR4 in fibrosis, however, herein this was not observed. The absence of an effect of AMD070 cannot be attributed to insufficient drug accumulation in the lungs since we measured AMD070 accumulation in the lungs in significant excess of the CXCR4 IC<sub>50</sub> and EC<sub>90</sub> for 21 of the first 24 hours after dosing (Fig 1). Furthermore, AMD070 administration was associated with the expected dose-dependent increase in peripheral WBCs in these animals peaking at three hours after administration (Fig 2). This observation is consistent with AMD070's ability to induce a dose related mobilization of bone marrow hematopoietic progenitors with a peak between two to three hours post dosing in human subjects [45].



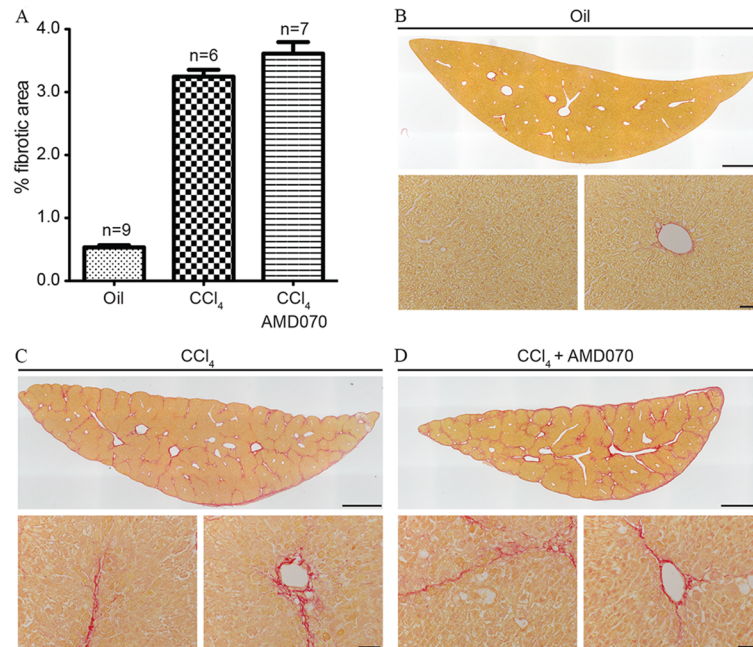

**Fig 9. AMD070 had no effect on CCl<sub>4</sub> induced liver fibrosis in C57BL/6 mice.** Liver fibrosis was measured using Picosirius red and scored percent areas are shown in panel (A). Panels from each of the treatment groups contain representative Picosirius Red stained left top lobe of livers from the oil plus PBS (B), CCl<sub>4</sub> plus PBS (C) and CCl<sub>4</sub> plus AMD070 (D) groups respectively. Bars represent 1 mm for the top image and 50 μm for the lower images in each panel.

doi:10.1371/journal.pone.0151765.g009

In spite of the absence of an effect of AMD070 on BLM-induced fibrosis, there was a very striking effect on mortality in this model. Specifically, AMD070 treatment was associated with an increase in survival from 40% to 90% (Fig 6). In a rat model of BLM induced fibrosis, it was suggested that a “switch” between inflammation and the fibrotic phase occurred at around day 9 [50]. Inflammatory cytokine levels (IL-1α, IL-1β, IL6 and IFN-γ) increased rapidly by 3 days post BLM treatment and remain elevated up to day 9 [50]. Concurrently, there was an increase in collagen deposition starting at day 9, which was more pronounced on day 14 and 21 with a decline of the inflammatory cytokines on day 14 [50]. Similarly, it was found that 7 days post BLM treatment, increased vascular permeability and infiltration of neutrophil and lymphocytes into the lung were observed in mice [51, 52]. By 14 days post BLM administration, proliferation of fibroblasts and lung fibrosis were observed [51, 52]. In our study, mortality in the BLM group occurred between days 8 to 14, a period of vascular leakage and inflammation prior to the fibrotic phase and which was almost completely mitigated by AMD070 (Fig 6). This is consistent with the report that another potent CXCR4 antagonist, AMD3100 was able to alleviate mortality associated with BLM induced PF [53]. These data lead us to conclude that a role for the CXCL12/CXCR4 signaling axis in BLM-induced fibrosis is negligible. However, there may be a very important role for signaling via CXCR4 in the earlier inflammatory and vascular leakage phase of injury in this model. Thus, this may represent an opportunity for therapeutic intervention.

### Hepatic fibrosis

Since the effects of AMD070 on BLM induced fibrosis were uncertain, we tested the efficacy of this drug in a CCl<sub>4</sub> induced murine model of hepatic fibrosis and AMD070 treatment by IP



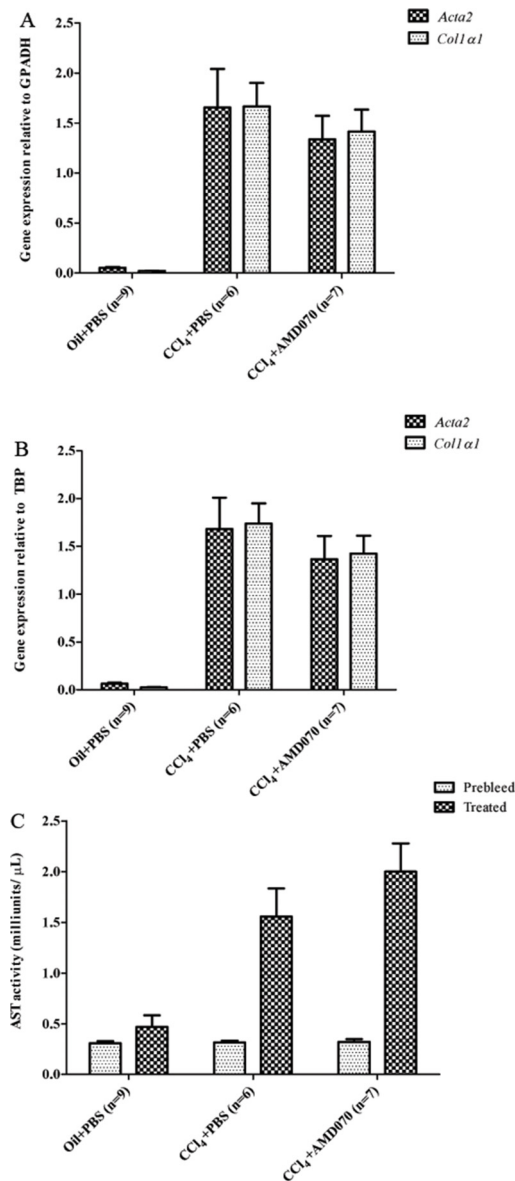

**Fig 10. AMD070 had neither an effect on the *Acta2* and *Col1a1* transcription levels in the liver nor serum AST levels.** The relative transcription levels of *Acta2* and *Col1a1* are shown relative to housekeeping genes *Gapdh* (A) and *Tbp* (B). Serum AST levels are shown in panel (C). Prebleed is serum collected prior to CCl<sub>4</sub> and AMD070 treatment. Treated is serum collected one day after the last AMD070 or PBS treatment.

doi:10.1371/journal.pone.0151765.g010

injection. As was observed in the studies described above in which AMD070 was given by PO, when administered by IP injection, significant levels of AMD070 were observed in the plasma, lungs and liver of the mice for 24 hours after injection (Fig 7). In addition, IP administration of AMD070 was also associated with the expected pharmacodynamic effects on WBC mobilization (Fig 8). As expected, CCl<sub>4</sub> treatment induced clear evidence of liver fibrosis based on Picrosirius red staining (Fig 9) and liver injury based on serum AST levels (Fig 10C). However, treatment with AMD070 had no effect on liver function based on the AST levels (Fig 10C) and the percent liver fibrosis was not different between the CCl<sub>4</sub> plus PBS vs. CCl<sub>4</sub> plus AMD070 groups (Fig 9). When liver RNA was evaluated for the transcript levels of *Acta2* and *Col1a1*,

their relative abundance were not different between the CCl<sub>4</sub> plus PBS and CCl<sub>4</sub> plus AMD070 groups (Fig 10A & 10B). These data are inconsistent with the study by Saiman et al., which demonstrated that inhibiting CXCR4 with AMD3100 increased liver fibrosis and increased transcript levels of *Acta2* and *Col1a1* [42].

Activation of HSCs is known to play a major role in liver fibrogenesis [2, 9, 11]. It had been shown that CXCR4/CXCL12 signaling activates HSCs and induces their proliferation, and can lead to increased production of collagen I under fibrotic conditions [36]. Furthermore, recent studies have demonstrated that the majority of myofibroblasts following liver damage derive from “activated” HSCs [54]. AMD070 was delivered at the outset of the study and throughout the CCl<sub>4</sub> treatment period, with a negligible impact on multiple markers of fibrosis. These observations indicate that the CXCL12/CXCR4 signaling axis has a limited role in liver fibrosis. It is possible that other mechanisms of HSC activation independent of CXCR4/CXCL12 signaling are operating as suggested by Saiman et al. [42]. Evidence for this comes from studies in which knockdown of CXCR4 only partially suppressed the proliferative response of HSC to CXCR4/CXCL12 signaling [42].

## Conclusion

Taken together, our results showed little evidence for a key pathological role of signaling via the CXCL12/CXCR4 axis in either the BLM-induced PF model or the CCl<sub>4</sub>-induced hepatic fibrosis model. Collectively, our findings suggest that CXCR4 represents a relatively poor therapeutic target (at least in lung and liver) for modulating the fibrotic response. Instead, they suggest a significant effect of the CXCR4 antagonist on survival in the BLM-induced PF model only during the early inflammatory and vascular leakage phase. Future work should focus on exploring the biological signaling occurring during these phases of injury and recovery following BLM induced lung injury.

## Author Contributions

Conceived and designed the experiments: LNC PS KMM JC MW TMU. Performed the experiments: LNC PS BYYN BL MRH RWS VG SL ES IM IB. Analyzed the data: LNC PS. Contributed reagents/materials/analysis tools: KMM TMU. Wrote the paper: LNC. Reviewed and edited manuscript: PS KMM JC MW TMU.

## References

1. Friedman SL. The cellular basis of hepatic fibrosis: mechanisms and treatment strategies. *The New England Journal of Medicine*. 1993; 328(25):1828–35. PMID: [8502273](#)
2. Friedman SL. Molecular regulation of hepatic fibrosis, an integrated cellular response to tissue injury. *The Journal of Biological Chemistry*. 2000; 275(4):2247–50. PMID: [10644669](#)
3. Ramachandran P, Iredale JP. Liver fibrosis: a bidirectional model of fibrogenesis and resolution. *QJM: Monthly Journal of the Association of Physicians*. 2012; 105(9):813–7. doi: [10.1093/qjmed/hcs069](#) PMID: [22647759](#)
4. Henderson NC, Iredale JP. Liver fibrosis: cellular mechanisms of progression and resolution. *Clinical Science*. 2007; 112(5):265–2280. PMID: [17261089](#)
5. Wu J, Zern MA. Hepatic stellate cells: a target for the treatment of liver fibrosis. *Journal of Gastroenterology*. 2000; 35(9):665–72. PMID: [11023037](#)
6. Iredale JP. Models of liver fibrosis: exploring the dynamic nature of inflammation and repair in a solid organ. *The Journal of Clinical Investigation*. 2007; 117(3):539–48. PMID: [17332881](#)
7. Weiler-Normann C, Herkel J, Lohse AW. Mouse models of liver fibrosis. *Zeitschrift für Gastroenterologie*. 2007; 45(1):43–50.
8. Lim Y-S, Kim WR. The global impact of hepatic fibrosis and end-stage liver disease. *Clinical Liver Disease*. 2008; 12(4):733–46.

9. Eng FJ, Friedman SL. Fibrogenesis I. New insights into hepatic stellate cell activation: the simple becomes complex. *American Journal of Physiology Gastrointestinal & Liver Physiology*. 2000; 279(1): G7–G11.
10. Wang X-D. Chronic alcohol intake interferes with retinoid metabolism and signaling. *Nutrition Reviews*. 1999; 57(2):51–9. PMID: [10079703](#)
11. Wu J, ZM A. Hepatic stellate cells: a target for the treatment of liver fibrosis. *Journal of Gastroenterology*. 2000; 35(9):665–72. PMID: [11023037](#)
12. King TE, Pardo A, Selman M. Idiopathic pulmonary fibrosis. *Lancet*. 2011; 378(9807):1946–61.
13. Bjoraker JA, Ryu JH, Edwin MK, Myers JL, Tazelaar HD, Schroeder DR, et al. Prognostic significance of histopathologic subsets in Idiopathic Pulmonary Fibrosis. *American Journal of Respiratory Cell and Critical Care Medicine*. 1998; 157(1):199–203.
14. Raghu G, Weycker D, Edelsberg J, Bradford WZ, Oster G. Incidence and prevalence of Idiopathic Pulmonary Fibrosis. *American Journal of Respiratory Cell and Critical Care Medicine*. 2006; 174(7):810–6.
15. Raghu G, Chen S-Y, Yeh W-S, Maroni B, Li Q, Lee Y-C, et al. Idiopathic pulmonary fibrosis in US Medicare beneficiaries aged 65 years and older: incidence, prevalence, and survival, 2001–11. *The Lancet Respiratory Medicine*. 2014; 2(7):566–72. doi: [10.1016/S2213-2600\(14\)70101-8](#) PMID: [24875841](#)
16. Nicod LP. Pirfenidone in idiopathic pulmonary fibrosis. *The Lancet*. 1999; 354(9175):268–9.
17. Noble PW, Albera C, Bradford WZ, Costable U, Glassberg MK, Kardatzk D, et al. Pirfenidone in patients with idiopathic pulmonary fibrosis (CAPACITY): two randomised trials. *The Lancet*. 2011; 377(9779):1760–9.
18. Raghu G, Johnson CW, Lockhart D, Mageto Y. Treatment of Idiopathic Pulmonary Fibrosis with a new antifibrotic agent, Pirfenidone. *American Journal of Respiratory Cell and Critical Care Medicine*. 1999; 159(4):1061–9.
19. Egan JJ. New treatments for pulmonary fibrosis? *The Lancet* 1999; 354(9193):1839–40.
20. Spagnolo P, Well AU, Collard HR. Pharmacological treatment of idiopathic pulmonary fibrosis: an update. *Drug Discovery Today*. 2015; 20(5):514–24. doi: [10.1016/j.drudis.2015.01.001](#) PMID: [25613790](#)
21. Hung C, Linn G, Chow YH, Kobayashi A, Mittelsteadt K, Altemeier WA, et al. Role of lung pericytes and resident fibroblasts in the pathogenesis of pulmonary fibrosis. *Am J Respir Crit Care Med*. 2013; 188(7):820–30. doi: [10.1164/rccm.201212-2297OC](#) PMID: [23924232](#); PubMed Central PMCID: PMC3826269.
22. Hashimoto N, Jin H, Liu T, Chensue SW, Phan SH. Bone marrow-derived progenitor cells in pulmonary fibrosis. *The Journal of Clinical Investigation*. 2004; 113(2):243–52. PMID: [14722616](#)
23. Makino H, Aono Y, Azuma M, Kishi M, Yokota Y, Kinoshita K, et al. Antifibrotic effects of CXCR4 antagonist in bleomycin-induced pulmonary fibrosis in mice. *The Journal of Medical Investigation*. 2013; 60(1.2):127–37. PMID: [23614921](#)
24. Moeller A, Gilpin SE, Ask K, Cox G, Cook D, Gauldie J, et al. Circulating fibrocytes are an indicator of poor prognosis in Idiopathic Pulmonary Fibrosis. *American Journal of Respiratory and Critical Care Medicine*. 2009; 179(7):588–94. doi: [10.1164/rccm.200810-1534OC](#) PMID: [19151190](#)
25. Phillips RJ, Burdick MD, Hong K, Lutz MA, Murray LA, Xue YY, et al. Circulating fibrocytes traffic to the lungs in response to CXCL12 and mediate fibrosis. *The Journal of Clinical Investigation*. 2004; 114(3):438–46. PMID: [15286810](#)
26. Song JS, Kang CM, Kang HH, Yoon HK, Kim YK, Kim KH, et al. Inhibitory effect of CXC chemokine receptor 4 antagonist AMD3100 on bleomycin induced murine pulmonary fibrosis. *Experimental and Molecular Medicine*. 2010; 42(6):465–76. PMID: [20498529](#)
27. Xu J, Mora A, Shim H, Stecenko A, Brigham KL, Rojas M. Role of the SDF-1/CXCR4 axis in the pathogenesis of lung injury and fibrosis. *American Journal of Respiratory Cell and Molecular Biology* 2007; 37(3):291–9. PMID: [17463394](#)
28. Kleaveland KR, Velikoff M, Yang J, Agarwal M, Rippe RA, Moore BB, et al. Fibrocytes are not an essential source of type I collagen during lung fibrosis. *J Immunol*. 2014; 193(10):5229–39. doi: [10.4049/jimmunol.1400753](#) PMID: [25281715](#); PubMed Central PMCID: PMC4233459.
29. Nagasawa T, Tachibana K, Kishimoto T. A novel CXC chemokine PBSF/SDF-1 and its receptor CXCR4: their functions in development, hematopoiesis and HIV infection. *Seminars in Immunology*. 1998; 10(3):179–85. PMID: [9653044](#)
30. Zou Y-R, Kottmann AH, Kuroda M, Taniuchi I, Littman DR. Function of the chemokine receptor CXCR4 in haematopoiesis and in cerebellar development. *Nature*. 1998; 393(6685):595–9. PMID: [9634238](#)

31. Bleul CC, Fuhlbrigge RC, Casasnovas JM, Aiuti A, Springer TA. A highly efficacious lymphocyte chemoattractant, stromal cell-derived factor 1 (SDF-1). *Journal of Experimental Medicine*. 1996; 184(3):1101–9. PMID: [9064327](#)
32. Dar A, Kollet O, Lapidot T. Mutual, reciprocal SDF-1/CXCR4 interactions between hematopoietic and bone marrow stromal cells regulate human stem cell migration and development in NOD/SCID chimeric mice. *Experimental Hematology*. 2006; 34(8):967–75. PMID: [16863903](#)
33. Lapidot T. Mechanism of human stem cell migration and repopulation of NOS/SCID and B2mnull NOD/SCID mice. *Annals of the New York Academy of Sciences*. 2001; 938:83–95.
34. Kollet O, Shvitiel S, Chen Y-Q, Suriawinata J, Thung SN, Dabeva MD, et al. HGF, SDF-1 and MMP-9 are involved in stress-induced human CD34+ stem cell recruitment to the liver. *The Journal of Clinical Investigation*. 2003; 112(2):160–9. PMID: [12865405](#)
35. Wald O, Pappo O, Safadi R, Dagan-Berger M, Beider K, Wald H, et al. Involvement of the CXCR12/CXCR4 pathway in the advanced liver disease that is associated with hepatitis C virus or hepatitis B virus *European Journal of Immunology*. 2004; 34(4):1164–74.
36. Hong F, Tuyama A, Lee TF, Loke J, Agarwal R, Cheng X, et al. Hepatic stellate cells express functional CXCR4: role in stromal cell-derived factor-1  $\alpha$ -mediated stellate cell activation. *Hepatology*. 2009; 49(6):2055–67. doi: [10.1002/hep.22890](#) PMID: [19434726](#)
37. Ding B-S, Cao Z, Lis R, Nolan DJ, Guo P, Simons M, et al. Divergent angiocrine signals from vascular niche balance liver regeneration and fibrosis. *Nature*. 2014; 505(7481):97–102. doi: [10.1038/nature12681](#) PMID: [24256728](#)
38. Debnath B, Xu S, Grande F, Garofalo A, Neamati N. Small molecule inhibitors of CXCR4. *Theranostics*. 2013; 3(1):47–75. doi: [10.7150/thno.5376](#) PMID: [23382786](#)
39. Hendrix CW, Flexner C, MacFarland RT, Giandomenico C, Fuchs EJ, Redpath E, et al. Pharmacokinetics and safety of AMD-3100, a novel antagonist of the CXCR-4 chemokine receptor, in human volunteers. *Antimicrobial Agents and Chemotherapy*. 2000; 44(6):1667–73. PMID: [10817726](#)
40. Watanabe M, Shirahama Y, Mitsuyama H, Oonakahara K-i, Noma S, Higashimoto I, et al. Retraction: Dual effect of AMD3100, a CXCR4 antagonist, on bleomycin-induced lung inflammation. *The Journal of Immunology*. 2008; 181(9):6670. PMID: [18941258](#)
41. Mark AL, Sun Z, Warren DS, Lonze BE, Knabel MK, Williams GMM, et al. Stem cell mobilization is life saving in an animal model of acute liver failure. *Annals of Surgery*. 2010; 252(4):591–6. doi: [10.1097/SLA.0b013e3181f4e479](#) PMID: [20881764](#)
42. Saiman Y, Jiao J, Fiel IM, Friedman SL, Alomant C, Bansal MB. Inhibition of the CXCL12/CXCR4 chemokine axis with AMD3100, a CXCR4 small molecule inhibitor, worsens murine hepatic injury. *Hepatology Research*. 2015; 45(7):794–803. doi: [10.1111/hepr.12411](#) PMID: [25163538](#)
43. Crawford JB, Gang C, David G, Trevor W, Bryon C, BI R., et al. AMD070, a CXCR4 chemokine receptor antagonist: practical large-scale laboratory synthesis. *Organic Process Research & Development*. 2008; 12(5):823–30.
44. Mosi RM, Anastassova V, Cox J, Drakes MC, Idzan SR, Labrecque J, et al. The molecular pharmacology of AMD11070: An orally bioavailable CXCR4 HIV entry inhibitor. *Biochemical Pharmacology*. 2012; 83(4):472–9. doi: [10.1016/j.bcp.2011.11.020](#) PMID: [22146583](#)
45. Stone ND, DS B., Charles F, Camlin T, CG B., Stephen B, et al. Multiple-dose escalation study of the safety, pharmacokinetics, and biologic activity of oral AMD070, a selective CXCR4 receptor inhibitor, in human subjects. *Antimicrobial Agents and Chemotherapy*. 2007; 51(7):2351–8. PMID: [17452489](#)
46. Ying Jun C, Flexner CW, Dunaway S, Park J- G, Klingman K, Wiggins I, et al. Effect of low-dose ritonavir on the pharmacokinetics of the CXCR4 antagonist AMD070 in healthy volunteers. *Antimicrobial Agents and Chemotherapy*. 2008; 52(5):1630–4. doi: [10.1128/AAC.01460-07](#) PMID: [18285477](#)
47. Dranse HJ, Sampaio AV, Petkovich M, Underhill TM. Genetic deletion of Cyp26b1 negatively impacts limb skeletogenesis by inhibiting chondrogenesis. *J Cell Sci*. 2011; 124(Pt 16):2723–34. doi: [10.1242/jcs.084699](#) PMID: [21807937](#).
48. Skerlj RT, Bridger GJ, Kaller A, McEachern EJ, Crawford JB, Zhou Y, et al. Discovery of novel small molecule orally bioavailable C-X-C chemokine receptor 4 antagonists that are potent inhibitors of T-tropic (X4) HIV-1 replication. *Journal of Medicinal Chemistry*. 2010; 53(8):3376–88. doi: [10.1021/jm100073m](#) PMID: [20297846](#)
49. Schols D, Struyf S, Damme JV, Este JA, Henson G, De Clercq E. Inhibition of T-tropic HIV strains by selective antagonization of the chemokine receptor CXCR4. *Journal of Experimental Medicine*. 1997; 186(8):1383–8. PMID: [9334378](#)
50. Chaudhary NI, Schnapp A, Park JE. Pharmacologic differentiation of inflammation and fibrosis in the rat bleomycin model. *American Journal of Respiratory and Critical Care Medicine*. 2006; 173(7):769–76. PMID: [16415276](#)

51. Hamada N, Kuwano K, Yamada M, Hagimoto N, Hiasa K, Egashira K, et al. Anti-vascular endothelial growth factor gene therapy attenuates lung injury and fibrosis in mice. *The Journal of Immunology*. 2005; 175(2):1224–31. PMID: [16002726](#)
52. Tager AM, LaCamera P, Shea BS, Campanella GS, Selman M, Zhao Z, et al. The lysophosphatidic acid receptor LPA<sub>1</sub> links pulmonary fibrosis to lung injury by mediating fibroblast recruitment and vascular leak. *Nature Medicine*. 2008; 14(1):45–54. PMID: [18066075](#)
53. Li F, Dai H, Jing G, Xuefeng X, editors. Inhibiting CXCR4/CXCRL12 axis attenuates lung fibrosis both in vitro and in vivo. *European Respiratory Society Annual Congress 2012*; 2012; Vienna, Austria.
54. Mederacke I, Hsu CC, Troeger JS, Huebener P, Mu X, Dapito DH, et al. Fate tracing reveals hepatic stellate cells as dominant contributors to liver fibrosis independent of its aetiology. *Nat Commun*. 2013; 4:2823. doi: [10.1038/ncomms3823](#) PMID: [24264436](#); PubMed Central PMCID: PMC4059406.
